# Supplementary material for: Crystal structure, luminescence properties and thermal stability of BaY2−xEuxGe3O10 phosphors with high colour purity for blue-excited pc-LEDs
Source: Royal Society of Chemistry journal article supplement (doi:10.1039/d0nj02677h), 2020-01-01
Supplement: d0nj02677h1.pdf [file d0nj02677h1.pdf]

## Electronic Supplementary Information (ESI)

### Crystal structure, luminescence properties and thermal stability of $\text{BaY}_{2-x}\text{Eu}_x\text{Ge}_3\text{O}_{10}$ phosphors with high colour purity for blue-excited pc-LEDs

Olga A. Lipina<sup>a\*</sup>, Ludmila L. Surat<sup>a</sup>, Yana V. Baklanova<sup>a</sup>, Leonid Yu. Mironov<sup>b</sup>,  
Andrey N. Enyashin<sup>a</sup>, Alexander Yu. Chufarov<sup>a</sup>, Alexander P. Tyutyunnik<sup>a</sup>, Vladimir G. Zubkov<sup>a</sup>

<sup>a</sup>*Institute of Solid State Chemistry, UB RAS, 620990 Ekaterinburg, Russia*

<sup>b</sup>*ITMO University, 197101, St. Petersburg, Russia*

\* Corresponding author. E-Mail: LipinaOlgaA@yandex.ru

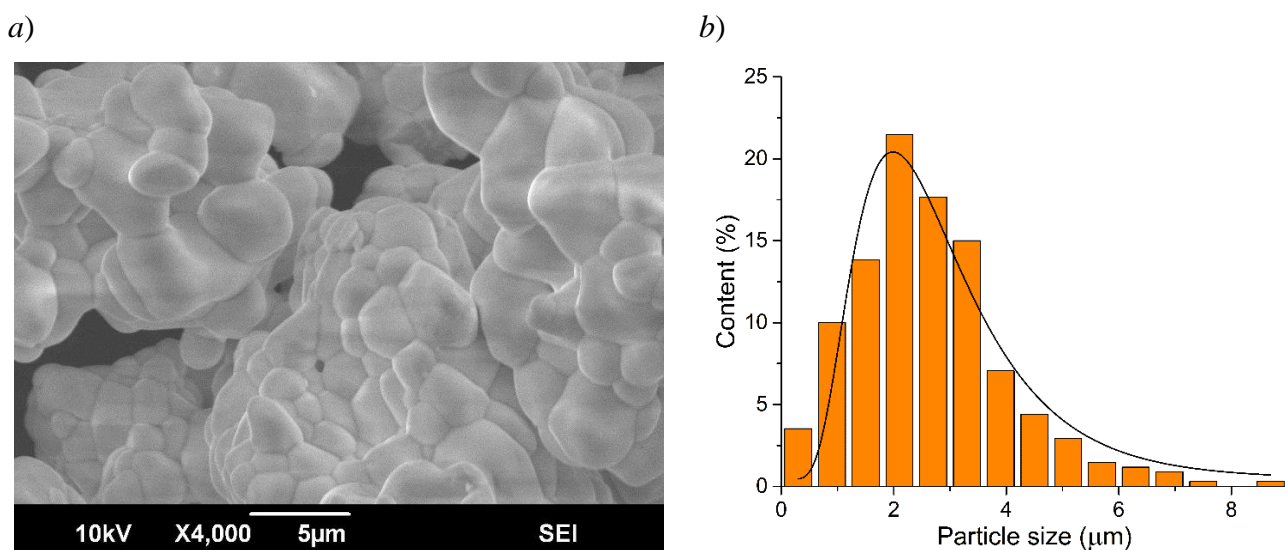

**Fig. S1** SEM image of  $\text{BaY}_{1.4}\text{Eu}_{0.6}\text{Ge}_3\text{O}_{10}$  powder (a) and the particle size distribution histogram with log-normal distribution fit (b).

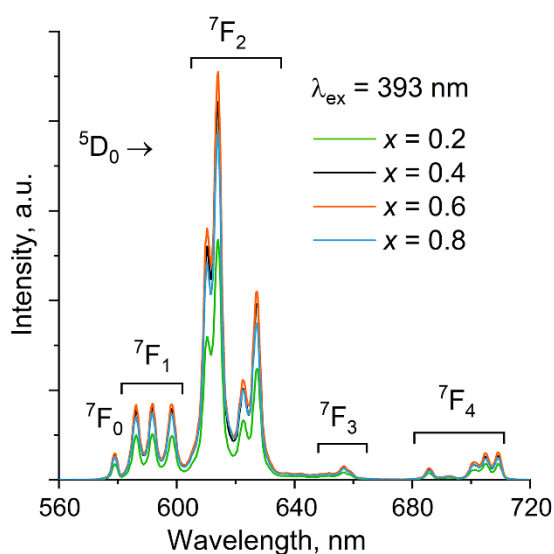

**Fig. S2** The PL spectra of  $\text{BaY}_{2-x}\text{Eu}_x\text{Ge}_3\text{O}_{10}$  ( $x = 0.2, 0.4, 0.6$  and  $0.8$ ) measured under 393 nm excitation.

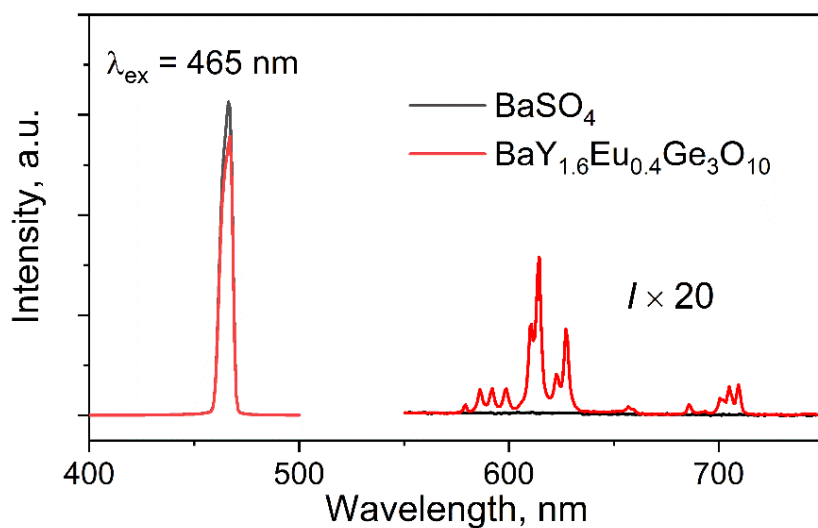

**Fig. S3** The results of the measurement of the external quantum efficiency for  $\text{BaY}_{1.6}\text{Eu}_{0.4}\text{Ge}_3\text{O}_{10}$  phosphor ( $\lambda_{\text{ex}} = 465 \text{ nm}$ ).

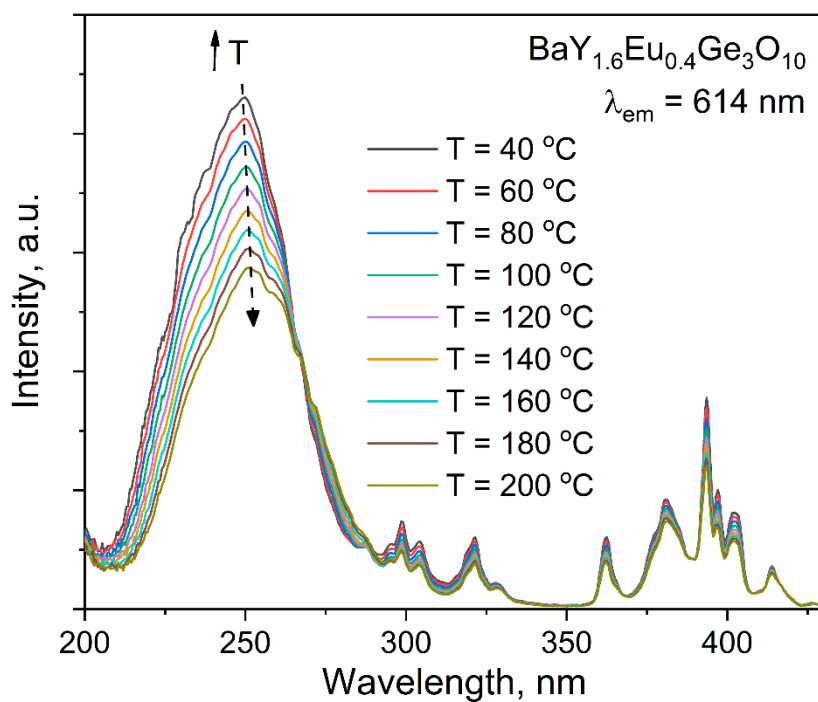

**Fig. S4** The PLE spectra of  $\text{BaY}_{1.6}\text{Eu}_{0.4}\text{Ge}_3\text{O}_{10}$  measured in the temperature range from  $40 \text{ }^\circ\text{C}$  to  $200 \text{ }^\circ\text{C}$  ( $\lambda_{\text{em}} = 614 \text{ nm}$ ).

**Table S1** Atomic coordinates and thermal parameters ( $\text{\AA}^2$ ) for  $\text{BaY}_{2-x}\text{Eu}_x\text{Ge}_3\text{O}_{10}$  ( $x = 0.1\text{--}0.8$ )

| Atom  |    |                | x = 0.1     | x = 0.2     | x = 0.3     | x = 0.4     | x = 0.5     | x = 0.6     | x = 0.7     | x = 0.8     |             |
|-------|----|----------------|-------------|-------------|-------------|-------------|-------------|-------------|-------------|-------------|-------------|
| Ba    | 2e | <i>x/a</i>     | 0.76580(32) | 0.76546(31) | 0.76543(25) | 0.76600(32) | 0.76526(31) | 0.7649(4)   | 0.7641(4)   | 0.7628(5)   |             |
|       |    | <i>y/b</i>     | 0.25        | 0.25        | 0.25        | 0.25        | 0.25        | 0.25        | 0.25        | 0.25        | 0.25        |
|       |    | <i>z/c</i>     | 0.01254(26) | 0.01308(25) | 0.01311(20) | 0.01377(26) | 0.01229(25) | 0.01276(28) | 0.01290(34) | 0.0114(4)   | 0.0114(4)   |
|       |    | $U_i/U_e^*100$ | 2.62(6)     | 2.50(6)     | 2.71(4)     | 2.55(8)     | 3.36(6)     | 3.42(7)     | 3.17(8)     | 5.14(11)    | 5.14(11)    |
| Y/Eu  | 4f | <i>x/a</i>     | 0.1542(4)   | 0.1540(4)   | 0.15315(28) | 0.1541(4)   | 0.15444(34) | 0.1549(4)   | 0.1544(5)   | 0.1557(6)   |             |
|       |    | <i>y/b</i>     | 0.10076(13) | 0.10047(12) | 0.10074(9)  | 0.10048(12) | 0.10012(12) | 0.10052(12) | 0.10021(15) | 0.10106(17) |             |
|       |    | <i>z/c</i>     | 0.67613(25) | 0.67672(24) | 0.67610(19) | 0.67622(26) | 0.67694(23) | 0.67645(27) | 0.67687(31) | 0.6762(4)   | 0.6762(4)   |
|       |    | $U_i/U_e^*100$ | 2.45(5)     | 2.44(5)     | 2.52(4)     | 2.60(8)     | 2.83(5)     | 3.40(5)     | 3.09(6)     | 5.13(8)     | 5.13(8)     |
|       |    | Fractions      | 0.95/0.05   | 0.90/0.10   | 0.85/0.15   | 0.80/0.20   | 0.75/0.25   | 0.70/0.30   | 0.65/0.35   | 0.60/0.40   |             |
| Ge(1) | 2e | <i>x/a</i>     | 0.5800(6)   | 0.5808(6)   | 0.58270(47) | 0.5819(6)   | 0.5840(6)   | 0.5853(7)   | 0.5863(8)   | 0.5886(10)  |             |
|       |    | <i>y/b</i>     | 0.25        | 0.25        | 0.25        | 0.25        | 0.25        | 0.25        | 0.25        | 0.25        | 0.25        |
|       |    | <i>z/c</i>     | 0.47717(46) | 0.47672(44) | 0.47710(35) | 0.47739(46) | 0.47747(44) | 0.47736(48) | 0.4785(6)   | 0.4780(7)   | 0.4780(7)   |
|       |    | $U_i/U_e^*100$ | 2.32(8)     | 2.29(8)     | 2.39(6)     | 2.42(10)    | 2.74(9)     | 2.73(9)     | 2.34(11)    | 4.06(15)    | 4.06(15)    |
| Ge(2) | 4f | <i>x/a</i>     | 0.3042(4)   | 0.3027(4)   | 0.30479(32) | 0.3039(4)   | 0.3032(4)   | 0.3049(5)   | 0.3059(6)   | 0.3081(7)   |             |
|       |    | <i>y/b</i>     | 0.05303(16) | 0.05299(15) | 0.05364(12) | 0.05329(16) | 0.05360(16) | 0.05370(17) | 0.05349(21) | 0.05388(25) |             |
|       |    | <i>z/c</i>     | 0.20266(32) | 0.20170(31) | 0.20288(25) | 0.20220(33) | 0.20173(31) | 0.20269(35) | 0.2034(4)   | 0.2042(5)   | 0.2042(5)   |
|       |    | $U_i/U_e^*100$ | 2.28(6)     | 2.26(6)     | 2.42(5)     | 2.28(9)     | 3.01(7)     | 3.08(7)     | 2.80(9)     | 4.59(11)    | 4.59(11)    |
| O(1)  | 2e | <i>x/a</i>     | 0.3436(26)  | 0.3388(25)  | 0.3448(20)  | 0.3357(27)  | 0.3428(26)  | 0.3383(28)  | 0.3405(35)  | 0.3442(39)  |             |
|       |    | <i>y/b</i>     | 0.25        | 0.25        | 0.25        | 0.25        | 0.25        | 0.25        | 0.25        | 0.25        | 0.25        |
|       |    | <i>z/c</i>     | 0.5901(18)  | 0.5964(17)  | 0.5906(14)  | 0.5970(19)  | 0.5974(18)  | 0.5981(19)  | 0.5974(24)  | 0.5967(28)  | 0.5967(28)  |
|       |    | $U_i/U_e^*100$ | 2.11(42)    | 1.66(39)    | 2.48(33)    | 2.65(45)    | 3.86(47)    | 3.34(48)    | 4.90(68)    | 4.8(7)      | 4.8(7)      |
| O(2)  | 2e | <i>x/a</i>     | 0.8842(29)  | 0.8893(26)  | 0.8806(21)  | 0.8867(27)  | 0.8862(27)  | 0.8951(30)  | 0.8943(32)  | 0.9048(40)  |             |
|       |    | <i>y/b</i>     | 0.25        | 0.25        | 0.25        | 0.25        | 0.25        | 0.25        | 0.25        | 0.25        | 0.25        |
|       |    | <i>z/c</i>     | 0.6358(20)  | 0.6414(18)  | 0.6378(15)  | 0.6376(18)  | 0.6379(18)  | 0.6425(20)  | 0.6393(21)  | 0.6349(27)  | 0.6349(27)  |
|       |    | $U_i/U_e^*100$ | 1.86(45)    | 0.90(40)    | 1.77(35)    | 0.57(41)    | 1.81(44)    | 1.48(45)    | 1.33(46)    | 1.0(6)      | 1.0(6)      |
| O(3)  | 4f | <i>x/a</i>     | 0.5683(17)  | 0.5680(17)  | 0.5673(13)  | 0.5642(18)  | 0.5654(16)  | 0.5654(18)  | 0.5632(20)  | 0.5659(23)  |             |
|       |    | <i>y/b</i>     | 0.1392(7)   | 0.1385(7)   | 0.1392(5)   | 0.1399(7)   | 0.1384(7)   | 0.1391(7)   | 0.1381(8)   | 0.1423(8)   | 0.1423(8)   |
|       |    | <i>z/c</i>     | 0.3178(15)  | 0.3180(14)  | 0.3173(11)  | 0.3175(15)  | 0.3182(14)  | 0.3195(15)  | 0.3216(17)  | 0.3194(19)  | 0.3194(19)  |
|       |    | $U_i/U_e^*100$ | 2.46(30)    | 2.42(29)    | 2.43(23)    | 2.98(33)    | 2.73(29)    | 2.22(30)    | 1.43(34)    | 1.2(4)      | 1.2(4)      |
| O(4)  | 4f | <i>x/a</i>     | 0.4501(18)  | 0.4484(18)  | 0.4477(14)  | 0.4430(19)  | 0.4382(17)  | 0.4255(19)  | 0.4234(23)  | 0.4126(28)  |             |
|       |    | <i>y/b</i>     | -0.0692(7)  | -0.0696(7)  | -0.0681(6)  | -0.0678(7)  | -0.0688(7)  | -0.0653(7)  | -0.0647(9)  | -0.0652(10) | -0.0652(10) |
|       |    | <i>z/c</i>     | 0.1777(14)  | 0.1777(15)  | 0.1779(11)  | 0.1821(15)  | 0.1827(14)  | 0.1791(16)  | 0.1818(19)  | 0.1757(23)  | 0.1757(23)  |
|       |    | $U_i/U_e^*100$ | 1.98(31)    | 2.43(33)    | 2.62(26)    | 2.10(34)    | 2.71(34)    | 3.28(39)    | 2.94(48)    | 4.6(6)      | 4.6(6)      |
| O(5)  | 4f | <i>x/a</i>     | 0.1298(18)  | 0.1314(17)  | 0.1296(14)  | 0.1290(18)  | 0.1354(18)  | 0.1266(20)  | 0.1217(24)  | 0.1131(27)  |             |
|       |    | <i>y/b</i>     | 0.1182(8)   | 0.1194(8)   | 0.1209(6)   | 0.1192(8)   | 0.1212(8)   | 0.1259(9)   | 0.1285(10)  | 0.1309(11)  | 0.1309(11)  |
|       |    | <i>z/c</i>     | -0.0138(15) | -0.0139(14) | -0.0151(11) | -0.0094(14) | -0.0128(15) | -0.0089(16) | -0.0062(19) | -0.0063(22) | -0.0063(22) |
|       |    | $U_i/U_e^*100$ | 2.42(29)    | 2.26(28)    | 3.05(24)    | 2.01(30)    | 3.99(32)    | 3.92(34)    | 3.70(41)    | 4.3(4)      | 4.3(4)      |
| O(6)  | 4f | <i>x/a</i>     | 0.1021(21)  | 0.1136(20)  | 0.1142(15)  | 0.1085(21)  | 0.1103(18)  | 0.1065(22)  | 0.1010(26)  | 0.0875(34)  |             |
|       |    | <i>y/b</i>     | 0.0415(8)   | 0.0424(7)   | 0.0408(6)   | 0.0418(7)   | 0.0427(7)   | 0.0417(7)   | 0.0441(9)   | 0.0440(11)  | 0.0440(11)  |
|       |    | <i>z/c</i>     | 0.3586(15)  | 0.3601(14)  | 0.3600(11)  | 0.3581(15)  | 0.3659(13)  | 0.3567(16)  | 0.3540(19)  | 0.3522(24)  | 0.3522(24)  |
|       |    | $U_i/U_e^*100$ | 2.71(32)    | 2.36(30)    | 2.27(23)    | 2.57(32)    | 1.97(28)    | 3.48(35)    | 3.01(41)    | 5.6(5)      | 5.6(5)      |

**Table S2** Selected interatomic distances (Å) for BaY<sub>2-x</sub>Eu<sub>x</sub>Ge<sub>3</sub>O<sub>10</sub> ( $x = 0.1-0.8$ )

|                                 | x = 0.1   | x = 0.2   | x = 0.3   | x = 0.4   | x = 0.5   | x = 0.6   | x = 0.7   | x = 0.8   |
|---------------------------------|-----------|-----------|-----------|-----------|-----------|-----------|-----------|-----------|
| Ba-O(1)                         | 3.223(13) | 3.209(12) | 3.222(10) | 3.222(13) | 3.196(12) | 3.206(13) | 3.205(17) | 3.190(19) |
| Ba-O(2)                         | 2.889(14) | 2.872(13) | 2.873(11) | 2.895(13) | 2.886(13) | 2.884(14) | 2.908(15) | 2.962(18) |
| Ba-O(3) ×2                      | 2.996(10) | 2.999(9)  | 2.993(7)  | 2.999(10) | 3.015(9)  | 3.016(9)  | 3.038(11) | 3.000(12) |
| Ba-O(4) ×2                      | 2.709(9)  | 2.704(9)  | 2.719(7)  | 2.729(9)  | 2.708(9)  | 2.717(9)  | 2.728(11) | 2.686(13) |
| Ba-O(5) ×2                      | 2.654(10) | 2.657(9)  | 2.640(8)  | 2.638(10) | 2.660(10) | 2.581(10) | 2.539(12) | 2.487(14) |
| <i>d</i> <sub>av</sub> (Ba-O)   | 2.854     | 2.850     | 2.850     | 2.856     | 2.856     | 2.840     | 2.840     | 2.812     |
| <i>D</i>                        | 0.060     | 0.060     | 0.060     | 0.060     | 0.060     | 0.067     | 0.073     | 0.080     |
| Y/Eu-O(1)                       | 2.292(9)  | 2.267(8)  | 2.299(7)  | 2.255(9)  | 2.280(8)  | 2.259(9)  | 2.273(11) | 2.272(12) |
| Y/Eu-O(2)                       | 2.353(9)  | 2.340(8)  | 2.363(7)  | 2.348(9)  | 2.355(9)  | 2.326(9)  | 2.329(10) | 2.290(12) |
| Y/Eu-O(4)                       | 2.196(10) | 2.204(10) | 2.216(8)  | 2.231(10) | 2.251(9)  | 2.326(10) | 2.338(12) | 2.395(15) |
| Y/Eu-O(5)                       | 2.220(10) | 2.215(9)  | 2.215(8)  | 2.255(9)  | 2.221(10) | 2.276(10) | 2.307(12) | 2.335(14) |
| Y/Eu-O(6)                       | 2.278(10) | 2.279(10) | 2.285(8)  | 2.288(10) | 2.240(9)  | 2.299(11) | 2.307(13) | 2.309(16) |
| Y/Eu-O(6)                       | 2.240(10) | 2.285(9)  | 2.272(7)  | 2.264(9)  | 2.273(8)  | 2.261(10) | 2.263(11) | 2.231(14) |
| <i>d</i> <sub>av</sub> (Y/Eu-O) | 2.263     | 2.265     | 2.275     | 2.274     | 2.270     | 2.291     | 2.303     | 2.305     |
| <i>D</i>                        | 0.016     | 0.015     | 0.016     | 0.014     | 0.015     | 0.011     | 0.009     | 0.015     |
| Ge(1)-O(1)                      | 1.719(15) | 1.779(14) | 1.730(11) | 1.800(15) | 1.778(15) | 1.811(15) | 1.798(20) | 1.790(21) |
| Ge(1)-O(2)                      | 1.750(14) | 1.786(13) | 1.730(11) | 1.759(14) | 1.751(14) | 1.797(15) | 1.779(16) | 1.808(21) |
| Ge(1)-O(3) ×2                   | 1.757(9)  | 1.761(9)  | 1.757(7)  | 1.749(9)  | 1.761(9)  | 1.748(9)  | 1.752(11) | 1.720(11) |
| <i>d</i> <sub>av</sub> (Ge1-O)  | 1.746     | 1.772     | 1.744     | 1.764     | 1.763     | 1.776     | 1.770     | 1.760     |
| Ge(2)-O(3)                      | 1.817(10) | 1.819(10) | 1.806(7)  | 1.807(10) | 1.805(9)  | 1.803(10) | 1.789(12) | 1.814(13) |
| Ge(2)-O(4)                      | 1.752(9)  | 1.753(9)  | 1.739(7)  | 1.714(9)  | 1.716(8)  | 1.649(9)  | 1.630(11) | 1.620(13) |
| Ge(2)-O(5)                      | 1.751(10) | 1.750(10) | 1.773(8)  | 1.734(10) | 1.748(10) | 1.781(11) | 1.802(13) | 1.841(15) |
| Ge(2)-O(6)                      | 1.781(11) | 1.737(10) | 1.739(8)  | 1.753(10) | 1.788(9)  | 1.758(11) | 1.767(13) | 1.827(15) |
| <i>d</i> <sub>av</sub> (Ge2-O)  | 1.775     | 1.765     | 1.764     | 1.752     | 1.764     | 1.748     | 1.747     | 1.776     |
